# Supplementary material
Source: ML conference proceedings conference paper supplement (https://openreview.net/forum?id=OuUKXhV2Uz)
Supplement: supplementary_material [file attachment]

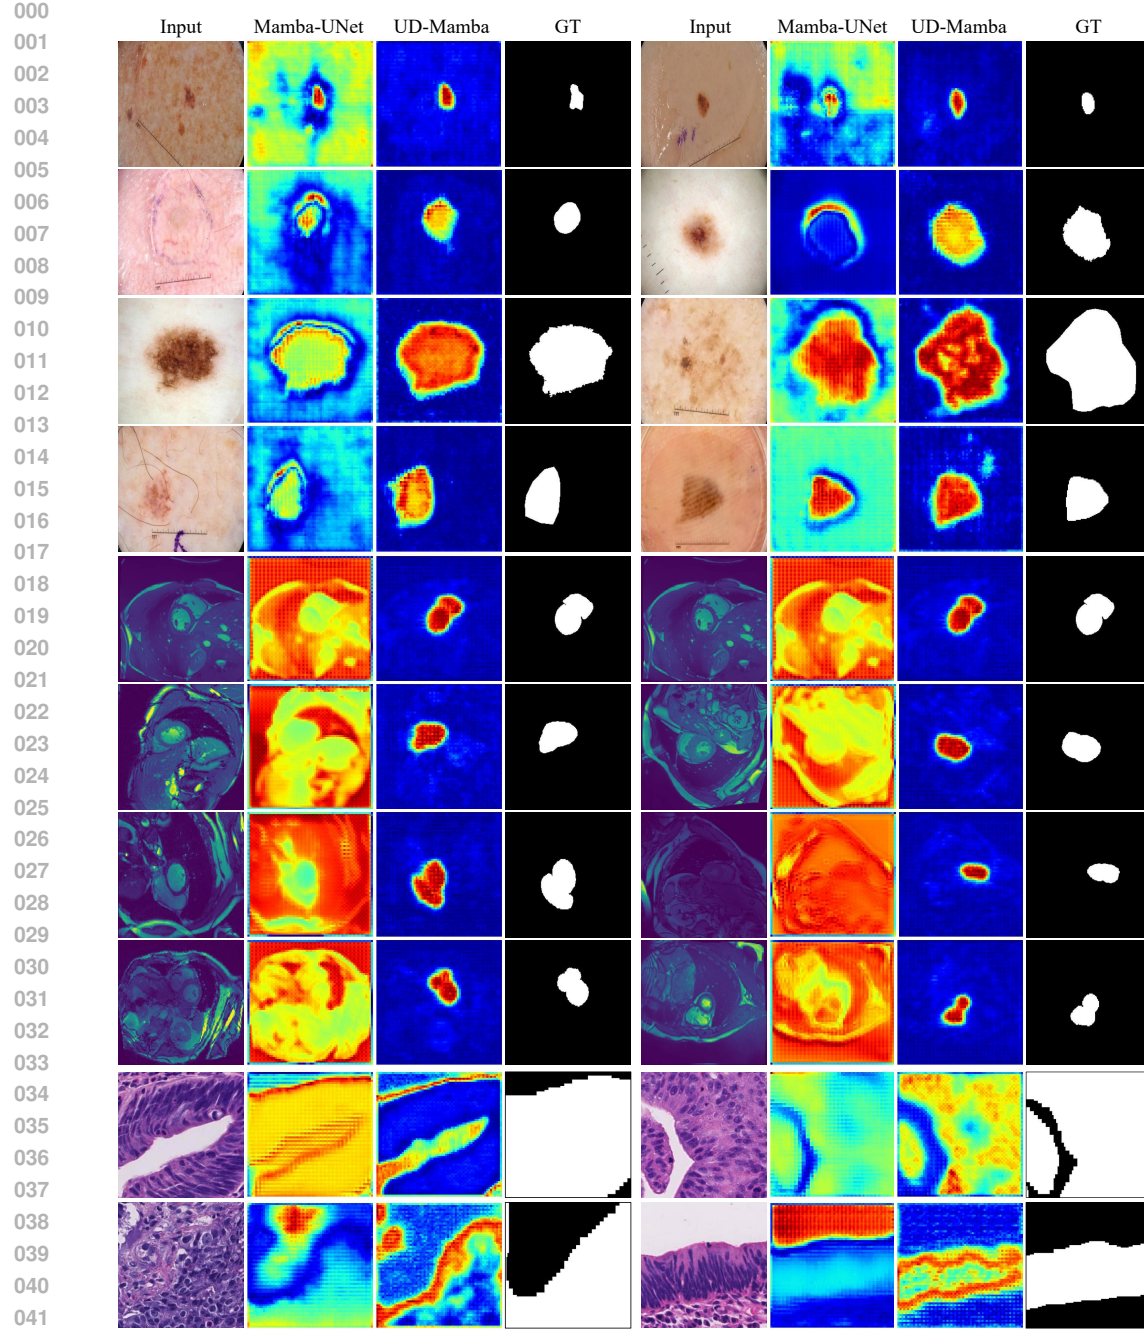

Figure 1: Visual comparisons of uncertainty maps

## 1 APPENDICE

We conducted additional comparisons of uncertainty maps to further demonstrate the superior modeling capabilities of UD-Mamba.
